# Supplementary material for: High-Dose Methylprednisolone Pulses for 3 Days vs. Low-Dose Dexamethasone for 10 Days in Severe, Non-Critical COVID-19: A Retrospective Propensity Score Matched Analysis
Source: MDPI journal article supplement (doi:10.3390/jcm10194465), 2021-09-28
Supplement: s1 [file s1]

## Supplementary files

Table S1. Doses of methylprednisolone (MP) used

| Dose of MP              | n (%)              |
|-------------------------|--------------------|
| MP 100mg for 3 days     | 3 patients (1.6%)  |
| MP 125mg for 3 days     | 170 patients (90%) |
| MP 250-500mg for 3 days | 16 patients (8.4%) |

Table S2. Percentage of missing data before multiple imputation

|                                    |     |
|------------------------------------|-----|
| Lymphocytes                        | <5% |
| CRP                                | <5% |
| D-dimer                            | <5% |
| LDH                                | 8%  |
| Ferritin                           | 20% |
| PaO <sub>2</sub> /FiO <sub>2</sub> | 20% |

Table S3. Risk factors of the combined outcome in the matched sample

|                                    | Univariate analysis |         | Multivariate analysis |         |
|------------------------------------|---------------------|---------|-----------------------|---------|
|                                    | OR (95%CI)          | p-value | OR (95%CI)            | p-value |
| Age/year                           | 0.99 (0.98-1.01)    | 0.811   | NS                    |         |
| Gender (female)                    | 0.85 (0.54-1.34)    | 0.491   | NS                    |         |
| BMI                                | 1.01 (0.97-1.05)    | 0.726   |                       |         |
| Smoking behavior                   |                     |         |                       |         |
| Never smoker                       | 1 ref.              |         |                       |         |
| Former smoker                      | 1.09 (0.69-1.72)    | 0.721   |                       |         |
| Current smoker                     | 1.63 (0.59-4.47)    | 0.343   |                       |         |
| Degree of dependency               |                     |         |                       |         |
| None or mild                       | 1 ref.              |         |                       |         |
| Moderate                           | 0.59 (0.25-1.39)    | 0.229   |                       |         |
| Severe                             | 2.69 (0.55-13.17)   | 0.220   |                       |         |
| Arterial hypertension              | 1.04 (0.70-1.56)    | 0.838   |                       |         |
| Dyslipidemia                       | 1.26 (0.84-1.88)    | 0.266   |                       |         |
| Diabetes mellitus                  | 1.16 (0.71-1.90)    | 0.555   |                       |         |
| Ischemic cardiopathy               | 0.63 (0.27-1.50)    | 0.300   |                       |         |
| Cerebrovascular disease            | 0.62 (0.16-2.33)    | 0.477   |                       |         |
| Dementia                           | 0.97 (0.38-2.52)    | 0.956   |                       |         |
| Chronic heart failure              | 0.91 (0.30-2.75)    | 0.863   |                       |         |
| Chronic liver disease              | 0.89 (0.32-2.50)    | 0.820   |                       |         |
| Severe chronic renal failure       | 0.64 (0.19-2.14)    | 0.470   |                       |         |
| Cancer                             | 1.18 (0.41-3.37)    | 0.762   |                       |         |
| COPD                               | 1.84 (0.74-4.59)    | 0.188   |                       |         |
| Asthma                             | 1.57 (0.28-8.68)    | 0.605   |                       |         |
| OSAS                               | 1.82 (0.77-4.30)    | 0.170   |                       |         |
| PaO <sub>2</sub> /FiO <sub>2</sub> | 0.98 (0.98-0.99)    | <0.001  | 0.99 (0.98-0.99)      | <0.001  |
| Respiratory rate >20 bpm           | 2.70 (1.78-4.11)    | <0.001  | 1.88 (1.17-3.02)      | 0.010   |
| Lymphocytes/ x10 <sup>6</sup> /l   | 1.00 (1.00-1.00)    | 0.435   |                       |         |
| CRP/ mg/l                          | 1.01 (1.01-1.01)    | <0.001  | NS                    |         |
| LDH/ U/l                           | 1.01 (1.01-1.01)    | <0.001  | 1.01 (1.01-1.01)      | <0.001  |
| Ferritin/ mcg/l                    | 1.00 (1.00-1.00)    | 0.176   |                       |         |
| D-dimer/ ng/ml                     | 1.00 (1.00-1.00)    | 0.050   | NS                    |         |
| Steroids                           |                     |         |                       |         |
| Bolus                              | 1.65 (1.10-2.47)    | 0.016   | NS                    |         |
| Remdesivir                         | 0.28 (0.07-1.08)    | 0.065   | 0.18 (0.04-0.80)      | 0.025   |
| Tocilizumab                        | 1.70 (1.13-2.57)    | 0.011   | 1.76 (1.09-2.84)      | 0.021   |

BMI: body mass index. NS: Not significant. COPD: chronic obstructive pulmonary disease. OSAS: obstructive sleep apnea syndrome. SOC: Standard of care CRP: C-reactive protein. LDH: lactate dehydrogenase.
